# Supplementary material
Source: PubMed Central journal article supplement (PMC1639513)
Supplement: rspb20063662s07.pdf [file rspb20063662s07.pdf]

## Electronic Appendix for Duncan & Forsyth “Island latitude and human disturbance explain the persistence of mammal invaders in the New Zealand archipelago”

### Outline of the methods used to model persistence times

Here we outline the methods used to model persistence times given interval, right and uncensored observations, and to incorporate the persistence time distributions predicted by stochastic population growth theory.

### Definitions

$T$  is a continuous random variable  $\geq 0$  representing the persistence time (time to natural extinction) of populations introduced to islands.  $T$  has a cumulative distribution function (cdf):

$$F(t) = P(T \leq t) = \int_0^t f(x)dx$$

where  $f(t)$  is the probability density function (pdf):

$$f(t) = \frac{dF(t)}{dt} = \lim_{\Delta t \rightarrow 0} \frac{P(t \leq T < t + \Delta t)}{\Delta t}$$

The probability that a population survives to time  $t$  is the survivor function:

$$S(t) = P(T > t) = 1 - F(t) = \int_t^{\infty} f(x)dx$$

The hazard function specifies the instantaneous rate of failure at  $T = t$  given that a population survived to time  $t$ :

$$h(t) = \lim_{\Delta t \rightarrow 0} \frac{P(t \leq T < t + \Delta t \mid T \geq t)}{\Delta t} = \frac{f(t)}{S(t)}$$

### Likelihood function for censored persistence time data

There are three types of censoring in our data:

1. Uncensored: the number of years the population persisted until extinction is known;  $T = t$

The contribution to the likelihood for an observation with this type of censoring is:

$$L_{ob} = f(t)$$

2. Right censored: extinction is not observed but occurs after time  $t$ ;  $T > t$

The contribution to the likelihood for an observation with this type of censoring is:

$$L_{rt} = P(T > t) = S(t)$$

3. Interval censored: extinction occurs in the interval  $(L,R]$ ;  $L < T \leq R$

The contribution to the likelihood for an observation with this type of censoring is:

$$L_{in} = P(L < T \leq R) = S(L) - S(R)$$

Let:

*ob*: indicate the set of introduced populations that have uncensored (observed) persistence times

*rt*: indicate the set of introduced populations that have right censored persistence times

*in*: indicate the set of introduced populations that have interval censored persistence times

Then the log-likelihood for this sample is:

$$L = \sum_{i \in ob} \ln[f(t_i)] + \sum_{i \in rt} \ln[S(t_i)] + \sum_{i \in in} \ln[S(L_i) - S(R_i)]$$

### **Distribution of persistence times under environmental stochasticity**

The inverse Gaussian distribution describes the distribution of persistence times for populations with density independent growth, unrestricted size, and where the risk of extinction is due to environmental stochasticity (Lande & Orzack 1988; Dennis *et al.* 1991).

The inverse Gaussian pdf is given by:

$$f(t) = \frac{n_0}{\sqrt{2\pi\sigma_e^2 t^3}} \exp\left[-\frac{(n_0 + \mu t)^2}{2\sigma_e^2 t}\right]$$

where:

$t$  is time

$n_0$  is the initial starting value, which is the natural logarithm of initial population size (which can be adjusted for the initial age structure)

$\mu$  is the infinitesimal mean parameter, which is related to the population growth rate,  $r$ , such that  $r = \mu + (\sigma_e^2/2)$

$\sigma_e^2$  is the infinitesimal variance of the process due to environmental stochasticity

The survival function has the form:

$$S(t) = \Phi\left[\frac{\mu t + n_0}{\sqrt{\sigma_e^2 t}}\right] - \exp\left(\frac{-2n_0\mu}{\sigma_e^2}\right) \Phi\left[\frac{\mu t - n_0}{\sqrt{\sigma_e^2 t}}\right]$$

where:

$\Phi$  is the standard normal cumulative distribution function (cdf)

### **Distribution of persistence times under demographic stochasticity**

For populations with density independent growth, unrestricted size, and where the risk of extinction is due to demographic stochasticity, the survival function is given by (Engen *et al.* 2005):

$$S(t) = 1 - \exp\left[-\frac{2n_0 r}{\sigma_d^2 (1 - e^{-rt})}\right]$$

and the resulting pdf has the form:

$$f(t) = \exp\left[-\frac{2n_0 r}{\sigma_d^2 (1 - e^{-rt})}\right] \left[ \frac{2n_0 r^2 e^{-rt}}{\sigma_d^2 (1 - e^{-rt})^2} \right]$$

where:

$\sigma_d^2$  is the infinitesimal variance of the process due to demographic stochasticity

### **Other distributions**

The pdf and survival functions for the other distributions we fitted to the data (exponential, lognormal and Weibull) are presented in standard survival analysis texts (e.g., Tableman & Kim 2004)

### **Model estimation**

We inserted the appropriate pdf and survival functions into the log-likelihood function and maximised this for our data using the built-in numerical optimization routines in the software package R version 2.0.1 (The R Development Core Team 2004). The functions for the distribution of persistence times assuming environmental and demographic stochasticity have three unknown parameters, one of which is initial population size. We lacked data on initial population size for most introductions in our dataset. We therefore set this initial value,  $n_0$ , to a constant value of 1 for all introductions. This choice of constant was arbitrary and makes no difference to our results: for other values the associated mean and variance parameters are scaled accordingly.

Dennis, B., Munholland, P.L. & Scott, J.M. 1991 Estimation of growth and extinction parameters for endangered species. *Ecological Monographs* **61**, 115-143.

Engen, S., Lande, R., Sæther, B.-E. & Weimerskirch, H. 2005 Extinction in relation to demographic and environmental stochasticity in age-structured models. *Mathematical Biosciences* **195**, 210-227.

Lande, R. & Orzack, S.H. 1988 Extinction dynamics of age-structured populations in a fluctuating environment. *Proceedings of the National Academy of Sciences, USA* **85**, 7418-7421.

Tableman, M. & Kim, J.S. 2004 *Survival analysis using S: analysis of time-to-event data*. Boca Raton: Chapman & Hall / CRC.

The R Development Core Team 2004 *The R environment for statistical computing and graphics. Version 2.0.1.*  
<http://www.r-project.org>.

## Data

The following table lists the data and reference sources used in this study.

Table explanations:

Farm: 0 = never farmed

1 = farmed

Outcome: x = died out without direct human intervention, e = eradicated by humans, p = present at last record

T1 & T2: For eradicated and present species, T1 is the persistence time of the population (number of years following introduction until either eradication or the last recorded visit confirming an extant population).

Species recorded as being introduced by settlers and that were still present on islands following a recent visit are given a minimum persistence time of 100 years. For extinct species, T1 and T2 are the upper and lower bounds defining the minimum and maximum number of years that a species persisted on an island until the population died out. If T2 is blank, then T1 is the known persistence time of the population until it died out. - indicates introductions where the persistence time of the population could not be determined.

| Island    | Island Group | Area (ha) | Lat. (deg) | Farm | Species | Outcome | T1 (years) | T2 (years) | Reference              |
|-----------|--------------|-----------|------------|------|---------|---------|------------|------------|------------------------|
| Adams     |              | 9896      | 50.92      | 0    | Goat    | x       | 1          | 40         | 1-4                    |
|           |              |           |            |      | Sheep   | x       | 1          | 5          | 2, 5, 6                |
| Allports  |              | 16        | 41.24      | 0    | Possum  | e       | 10         |            | 7, 8                   |
|           |              |           |            |      | Rabbit  | x       | -          |            | 9                      |
| Anchor    |              | 1525      | 45.76      | 0    | Cat     | x       | 1          | 208        | 10, 11                 |
|           |              |           |            |      | Pig     | x       | 1          | 200        | 10                     |
| Antipodes | Antipodes    | 2025      | 49.67      | 0    | Goat    | x       | 1          | 15         | 3, 5, 12, 13           |
|           |              |           |            |      | Sheep   | x       | 1          | 15         | 5, 6, 12, 13           |
| Aorangi   | Poor Knights | 110       | 35.48      | 0    | Pig     | e       | 116        |            | 7, 14, 15              |
| Arapawa   |              | 7785      | 41.23      | 1    | Cat     | p       | 100        |            | 11                     |
|           |              |           |            |      | Goat    | p       | 214        |            | 3, 16                  |
|           |              |           |            |      | Pig     | p       | 161        |            | 14, 17                 |
|           |              |           |            |      | Rabbit  | p       | 1          |            | 9                      |
|           |              |           |            |      | Sheep   | p       | 100        |            | 6                      |
| Auckland  | Auckland     | 45675     | 50.75      | 0    | Cat     | p       | 184        |            | 2, 11, 12              |
|           |              |           |            |      | Goat    | e       | 127        |            | 2, 3, 5, 7, 12, 16, 18 |
|           |              |           |            |      | Goat    | x       | 1          | 38         | 5                      |
|           |              |           |            |      | Pig     | p       | 183        |            | 2, 5, 14, 18           |

|                 |               |       |       |   |        |   |     |    |                 |
|-----------------|---------------|-------|-------|---|--------|---|-----|----|-----------------|
|                 |               |       |       |   | Possum | x | 1   | 72 | 2, 19, 20       |
|                 |               |       |       |   | Rabbit | x | 1   | 9  | 5               |
|                 |               |       |       |   | Sheep  | x | 1   | 70 | 2, 5, 12        |
| Blumine         |               | 377   | 41.17 | 0 | Pig    | e | 32  |    | 7, 14           |
| Bravo           |               | 20    | 46.97 | 0 | Possum | p | 38  |    | 19, 20          |
| Browns          |               | 58    | 36.83 | 0 | Rabbit | p | 20  |    | 7, 9            |
| Burgess         | Mokohinau     | 56    | 35.93 | 0 | Goat   | e | 73  |    | 3, 7, 16, 21    |
| Campbell        | Campbell      | 11216 | 52.50 | 1 | Cat    | x | 74  | 84 | 11, 12, 22      |
|                 |               |       |       |   | Goat   | x | 15  | 73 | 3, 5, 12, 13    |
|                 |               |       |       |   | Pig    | x | 1   | 18 | 5, 14, 23       |
|                 |               |       |       |   | Rabbit | x | 1   | 78 | 9               |
|                 |               |       |       |   | Sheep  | e | 94  |    | 5-7, 12, 13, 24 |
|                 |               |       |       |   | Sheep  | x | 1   | 6  | 5               |
| Chatham         | Chatham       | 90650 | 43.80 | 1 | Cat    | p | 150 |    | 11              |
|                 |               |       |       |   | Pig    | p | 140 |    | 14, 25, 26      |
|                 |               |       |       |   | Possum | p | 79  |    | 19              |
|                 |               |       |       |   | Sheep  | p | 89  |    | 6, 25, 26       |
| Codfish         |               | 1396  | 46.78 | 0 | Possum | e | 97  |    | 7, 8, 19, 20    |
| Cuvier          |               | 170   | 36.44 | 1 | Cat    | e | 75  |    | 7, 11, 27-29    |
|                 |               |       |       |   | Goat   | e | 71  |    | 3, 7, 16, 27-29 |
| D'Urville       |               | 16782 | 40.83 | 1 | Cat    | p | 100 |    | 11              |
|                 |               |       |       |   | Pig    | p | 100 |    | 14, 17          |
|                 |               |       |       |   | Possum | x | -   |    | 19              |
|                 |               |       |       |   | Rabbit | p | 16  |    | 9               |
| East            |               | 13    | 37.67 | 0 | Goat   | e | 54  |    | 3, 7, 16, 30    |
| Enderby         | Auckland      | 710   | 50.51 | 0 | Goat   | x | 25  |    | 31              |
|                 |               |       |       |   | Pig    | x | 15  |    | 31              |
|                 |               |       |       |   | Pig    | x | 20  |    | 31              |
|                 |               |       |       |   | Rabbit | e | 128 |    | 31              |
|                 |               |       |       |   | Rabbit | x | 5   |    | 31              |
|                 |               |       |       |   | Sheep  | x | 5   |    | 31              |
|                 |               |       |       |   | Sheep  | x | 5   |    | 31              |
| Ernest          |               | 71    | 46.94 | 0 | Goat   | e | 32  |    | 3, 7, 16        |
| Ewing           | Auckland      | 54    | 50.53 | 0 | Goat   | x | 9   | 45 | 1-3, 5          |
|                 |               |       |       |   | Goat   | x | 1   | 8  | 5               |
| Figure-of-eight | Auckland      | 5     | 50.78 | 0 | Goat   | x | 1   | 85 | 1, 2            |
|                 |               |       |       |   | Sheep  | x | 1   | 85 | 1, 2            |
| Forsyth         |               | 775   | 40.96 | 1 | Cat    | p | 100 |    | 11              |
|                 |               |       |       |   | Goat   | p | -   |    | 3, 16           |
| Friday          | Auckland      | 1.5   | 50.50 | 0 | Rabbit | e | 5   |    | 2, 9            |
| Great Barrier   | Great Barrier | 27761 | 36.09 | 1 | Cat    | p | 100 |    | 11, 32          |
|                 |               |       |       |   | Goat   | p | 17  |    | 3, 16, 32       |
|                 |               |       |       |   | Pig    | p | 9   |    | 14, 32          |
|                 |               |       |       |   | Rabbit | p | 11  |    | 9, 32           |
| Great King      | Three Kings   | 408   | 34.10 | 0 | Goat   | e | 57  |    | 3, 7, 16        |
| Great Mercury   | Mercury       | 1860  | 36.61 | 1 | Cat    | p | 100 |    | 11              |
|                 |               |       |       |   | Goat   | p | 83  |    | 3, 15, 33       |
| Haulashore      |               | 6     | 41.27 | 0 | Rabbit | p | 31  |    | 9               |
| Herekopare      |               | 28    | 46.87 | 0 | Cat    | e | 46  |    | 7, 11, 34, 35   |
|                 |               |       |       |   | Goat   | e | 3   |    | 7, 16           |
| Inner Chetwode  | Chetwode      | 242   | 40.89 | 0 | Pig    | e | 26  |    | 7, 14, 36       |
|                 |               |       |       |   | Pig    | e | 11  |    | 7, 14, 36       |
|                 |               |       |       |   | Rabbit | x | 1   | 50 | 9, 36           |
| Kaikoura        |               | 535   | 36.18 | 1 | Goat   | p | -   |    | 16, 37          |
|                 |               |       |       |   | Pig    | p | 5   |    |                 |
| Kapiti          |               | 1970  | 40.85 | 1 | Cat    | e | 29  |    | 7, 11           |

|                |           |       |       |   |        |   |     |     |              |
|----------------|-----------|-------|-------|---|--------|---|-----|-----|--------------|
|                |           |       |       |   | Goat   | e | 98  |     | 3, 7, 16     |
|                |           |       |       |   | Possum | e | 94  |     | 7, 8, 19, 20 |
|                |           |       |       |   | Sheep  | e | 73  |     | 6, 7         |
| Kawau          |           | 2050  | 36.42 | 1 | Cat    | p | 100 |     | 11           |
|                |           |       |       |   | Possum | p | 121 |     | 19, 20       |
| Korapuki       | Mercury   | 18    | 36.66 | 0 | Rabbit | e | 88  |     | 7, 9         |
| Leper          | Mokopuna  | 1     | 41.25 | 0 | Rabbit | e | 4   |     | 7, 9         |
| Little Barrier |           | 3083  | 36.20 | 0 | Cat    | e | 113 |     | 7, 11, 38    |
| Macauley       | Kermadecs | 306   | 30.23 | 0 | Goat   | e | 134 |     | 3, 7, 16     |
|                |           |       |       |   | Pig    | x | -   |     | 14           |
| Macquarie      |           | 12785 | 54.5  | 0 | Cat    | p | 170 |     | 39           |
|                |           |       |       |   | Rabbit | p | 112 |     | 39           |
|                |           |       |       |   | Sheep  | x | 7   |     | 39, 40       |
|                |           |       |       |   | Sheep  | x | 1   | 22  | 39, 41       |
|                |           |       |       |   | Goat   | e | 12  |     | 39, 40       |
|                |           |       |       |   | Goat   | e | 9   |     | 39, 41       |
| Mahurangi      |           | 23    | 36.55 | 0 | Goat   | e | 15  |     | 3, 42        |
| Mangere        | Chatham   | 113   | 44.30 | 1 | Cat    | e | 57  |     | 9, 11, 43    |
|                |           |       |       |   | Goat   | x | -   |     | 3, 44        |
|                |           |       |       |   | Rabbit | x | 1   | 100 | 7, 9         |
|                |           |       |       |   | Sheep  | e | 68  |     | 6, 7         |
| Masked         | Auckland  | 5     | 50.75 | 0 | Cat    | p | -   |     | 2, 11        |
| Maud           |           | 309   | 41.03 | 1 | Goat   | e | 11  |     | 3, 7, 16     |
|                |           |       |       |   | Rabbit | e | 79  |     | 9            |
| Mayor          |           | 1277  | 37.70 | 0 | Cat    | p | 64  |     | 11           |
|                |           |       |       |   | Pig    | p | 45  |     | 7, 14, 45    |
| Mokinui        | Moggy     | 86    | 47.15 | 0 | Cat    | p | 72  |     | 34, 46, 47   |
| Monumental     | Auckland  | 4     | 50.83 | 0 | Goat   | x | 1   | 86  | 1, 2         |
| Motuara        |           | 59    | 41.09 | 1 | Pig    | e | 111 |     | 7, 48        |
|                |           |       |       |   | Rabbit | x | 1   | 202 | 9            |
| Motuihe        |           | 195   | 36.82 | 1 | Cat    | p | 9   |     | 7            |
|                |           |       |       |   | Cat    | e | 78  |     | 11           |
|                |           |       |       |   | Rabbit | x | 1   | 26  | 9, 48        |
|                |           |       |       |   | Rabbit | p | 70  |     | 9            |
| Motukaha       |           | 0.4   | 36.77 | 0 | Rabbit | x | -   |     | 49           |
| Motukahaua     |           | 22    | 36.66 | 0 | Rabbit | p | 21  |     | 9, 50, 51    |
| Motukawanui    | Cavalli   | 380   | 35.00 | 1 | Pig    | x | -   |     | 14           |
| Motumaire      |           | 5     | 35.28 | 0 | Rabbit | p | -   |     | 9            |
| Motunau        |           | 3.5   | 43.06 | 0 | Rabbit | e | 112 |     | 7, 9, 52     |
| Motuuruhi      |           | 57    | 36.74 | 0 | Goat   | e | -   |     | 3, 51        |
|                |           |       |       |   | Pig    | e | -   |     | 14, 51       |
| Moturoa        |           | 157   | 35.22 | 0 | Rabbit | p | -   |     | 9            |
| Moturua        |           | 24    | 36.70 | 0 | Rabbit | p | 7   |     | 9, 50, 51    |
| Moturua        |           | 162   | 35.23 | 0 | Cat    | p | -   |     | 53           |
|                |           |       |       |   | Pig    | x | 1   | 123 | 54           |
| Motutapere     |           | 50    | 36.78 | 0 | Possum | e | 95  |     | 8            |
| Motutapu       |           | 1560  | 36.76 | 1 | Cat    | p | -   |     | 11           |
|                |           |       |       |   | Possum | e | 128 |     | 8, 19        |
|                |           |       |       |   | Rabbit | p | 109 |     | 9            |
| Motuhi         |           | 22    | 36.68 | 0 | Rabbit | p | -   |     | 9, 50        |
| Native         |           | 60    | 46.92 | 0 | Goat   | x | 1   | 102 | 37           |
|                |           |       |       |   | Pig    | x | -   |     | 14           |
|                |           |       |       |   | Possum | p | 28  |     | 19, 20       |
|                |           |       |       |   | Rabbit | e | 8   |     | 7, 9         |
| Ngawhiti       |           | 1.5   | 40.81 | 0 | Rabbit | e | 5   |     | 9            |

|                   |               |        |       |   |        |   |     |    |                |
|-------------------|---------------|--------|-------|---|--------|---|-----|----|----------------|
| Northern Junction | Junction      | 1      | 36.24 | 0 | Rabbit | p | -   |    | 55             |
| Nukutaunga        | Cavalli       | 13     | 34.98 | 0 | Goat   | e | -   |    | 7, 16, 56      |
| Ocean             | Auckland      | 8      | 50.53 | 0 | Goat   | e | 77  |    | 1, 2, 5, 7, 16 |
|                   |               |        |       |   | Sheep  | e | 4   |    | 2, 12          |
| Ohinau            | Ohena         | 43     | 36.73 | 0 | Rabbit | p | 92  |    | 9              |
| Okokewa           | Great Barrier | 7.5    | 36.14 | 0 | Rabbit | p | -   |    | 9              |
| Otata             | Noises        | 15     | 38.70 | 0 | Rabbit | e | 15  |    | 7, 9, 15, 57   |
| Outer Chetwode    | Chetwode      | 81     | 40.89 | 1 | Pig    | e | 9   |    | 7              |
|                   |               |        |       |   | Pig    | e | 7   |    | 7              |
| Pararaki          | Sugarloaf     | 0.8    | 39.05 | 0 | Rabbit | x | -   |    | 9, 58, 59      |
| Penguin           | Slipper       | 10     | 37.07 | 0 | Rabbit | p | 9   |    | 9, 15          |
| Pickersgill       |               | 103    | 41.17 | 0 | Pig    | e | -   |    | 17             |
| Pitt              | Chatham       | 6203   | 44.30 | 1 | Cat    | p | 122 |    | 11, 25         |
|                   |               |        |       |   | Pig    | p | 100 |    | 14, 60         |
|                   |               |        |       |   | Sheep  | p | 100 |    | 6              |
| Ponui             |               | 1795   | 36.86 | 1 | Cat    | p | 129 |    | 11, 61         |
|                   |               |        |       |   | Pig    | e | 66  |    | 62             |
|                   |               |        |       |   | Rabbit | x | -   |    |                |
| Pourewa           |               | 42     | 38.39 | 0 | Goat   | e | 43  |    | 37             |
| Puangiangi        | Rangitoto     | 69     | 40.77 | 0 | Rabbit | p | 35  |    | 9              |
| Putauhina         |               | 141    | 47.20 | 0 | Cat    | x | -   |    | 11, 46, 47     |
| Quail             |               | 88     | 43.63 | 1 | Rabbit | p | 137 |    | 7, 9           |
| Rakitu            |               | 328    | 36.13 | 1 | Cat    | x | -   |    | 11, 63         |
|                   |               |        |       |   | Goat   | p | -   |    | 16             |
|                   |               |        |       |   | Pig    | e | 10  |    | 14             |
| Rangiahua         |               | 65     | 36.23 | 1 | Rabbit | p | -   |    | 55             |
| Rangipukea        |               | 34     | 36.83 | 0 | Possum | p | 70  |    | 19             |
| Rangitoto         |               | 2321   | 36.81 | 0 | Cat    | p | -   |    | 11             |
|                   |               |        |       |   | Possum | e | 129 |    | 8, 19, 20      |
| Raoul             | Kermadecs     | 2938   | 29.25 | 1 | Cat    | p | 154 |    | 7, 11, 64      |
|                   |               |        |       |   | Goat   | e | 148 |    | 3, 7, 16, 64   |
|                   |               |        |       |   | Pig    | e | -   |    | 14             |
| Rose              | Auckland      | 75     | 50.50 | 0 | Rabbit | e | 147 |    | 2, 5, 9, 31    |
|                   |               |        |       |   | Sheep  | x | 12  |    | 2, 31          |
| Ruapuke           |               | 1525   | 46.77 | 0 | Cat    | p | 100 |    | 11             |
|                   |               |        |       |   | Pig    | p | 110 |    | 14, 60         |
|                   |               |        |       |   | Possum | p | 75  |    | 19, 20         |
| Shoe              | Auckland      | 0.5    | 50.53 | 0 | Pig    | x | -   |    | 2              |
| Shoe              |               | 52     | 37.00 | 0 | Rabbit | p | 9   |    | 9, 15, 65      |
| Snares            | Snares        | 280    | 48.10 | 0 | Goat   | x | 1   | 12 | 5, 13, 66, 67  |
|                   |               |        |       |   | Goat   | x | 1   | 9  | 5, 13, 66, 67  |
| South East        | Chatham       | 219    | 44.35 | 1 | Goat   | e | 16  |    | 3, 7, 16       |
|                   |               |        |       |   | Sheep  | e | 46  |    | 6, 7           |
| southern Junction | Junction      | 7.5    | 36.24 | 0 | Rabbit | x | 1   | 20 | 9, 55          |
| Stanley           | Mercury       | 100    | 36.63 | 0 | Rabbit | e | 91  |    | 9, 68          |
| Steep-to          |               | 61     | 46.10 | 0 | Goat   | x | -   |    | 3              |
| Stephens          |               | 150    | 40.67 | 1 | Cat    | e | 33  |    | 7, 11          |
| Stewart           |               | 174600 | 47.00 | 1 | Cat    | p | 100 |    | 11             |
|                   |               |        |       |   | Pig    | e | 48  |    | 7, 14, 60      |
|                   |               |        |       |   | Possum | p | 100 |    | 19, 20         |
|                   |               |        |       |   | Rabbit | e | 8   |    | 7, 9           |
|                   |               |        |       |   | Rabbit | x | 1   | 80 | 9              |
| Tahoramaurea      |               | 0.8    | 40.89 | 0 | Rabbit | x | 1   | 77 | 9              |
| Taieri            |               | 6.9    | 46.05 | 0 | Rabbit | p | -   |    | 9              |
| Takangaroa        | Mayne         | 6      | 36.27 | 0 | Rabbit | e | 20  |    | 7, 9           |





## References

1. Rudge, M. R. & Campbell, D. J. (1977) The history and present status of goats on the Auckland Islands (New Zealand subantarctic) in relation to vegetation changes induced by man. *New Zealand Journal of Botany* **15**, 221-253.
2. Taylor, R. H. (1975) The distribution and status of introduced mammals on the Auckland Islands 1972-73, in *Preliminary results of the Auckland Islands Expedition 1972-73*, ed. Yaldwyn, J. C. (Department of Lands and Survey, Wellington), pp. 233-243.
3. Rudge, M. R. (1990a) Feral goat, in *The handbook of New Zealand mammals*, ed. King, C. M. (Oxford University Press, Auckland), pp. 406-423.
4. McLaren, F. B. (1948) *The Auckland Islands: their eventful history* (A.H. and A.W. Reed, Wellington).
5. Cockayne, L. (1904) A botanical excursion during midwinter to the southern islands of New Zealand. *Transactions and Proceedings of the New Zealand Institute* **36**, 225-?
6. Rudge, M. R. (1990b) Feral sheep, in *The handbook of New Zealand mammals*, ed. King, C. M. (Oxford University Press, Auckland), pp. 424-431.
7. Veitch, C. R. & Bell, B. D. (1990) Eradication of introduced animals from the islands of New Zealand, in *Ecological restoration of New Zealand islands*, eds. Towns, D. R., Daugherty, C. H. & Atkinson, I. A. E. (Department of Conservation, Wellington), pp. 137-146.
8. Clout, M. & Ericksen, K. (2000) Anatomy of a disastrous success: the brushtail possum as an invasive species, in *The brushtail possum*, ed. Montague, T. L. (Manaaki Whenua Press, Lincoln).
9. Flux, J. E. C. & Fullagar, P. J. (1992) World distribution of the Rabbit *Oryctolagus cuniculus* on islands. *Mammal Review* **22**, 151-205.
10. Begg, A. C. & Begg, N. C. (1966) *Dusky Bay* (Whitcombe & Tombs Ltd., Christchurch).
11. Fitzgerald, B. M. (1990) House cat, in *The handbook of New Zealand mammals*, ed. King, C. M. (Oxford University Press, Auckland), pp. 330-348.

12. Falla, R. A. (1965) Birds and mammals of the subantarctic islands. *Proceedings of the New Zealand Ecological Society* **12**, 63-68.
13. Reischek, A. (1888) Notes on the islands to the south of New Zealand. *Transactions and Proceedings of the New Zealand Institute* **21**, 378-389.
14. McIlroy, J. C. (1990) Feral pig, in *The handbook of New Zealand mammals*, ed. King, C. M. (Oxford University Press, Auckland), pp. 358-371.
15. McCallum, J. (1983) A review of Field Club research on northern offshore islands. *Tane* **29**, 223-245.
16. Parkes, J. P. (1990) Eradication of feral goats on islands and habitat islands. *Journal of the Royal Society of New Zealand* **20**, 297-304.
17. Clarke, C. M. H. & Dzieciolowski, R. M. (1991) Feral pigs in the northern South Island, New Zealand: 1. Origin, distribution, and density. *Journal of the Royal Society of New Zealand* **21**, 237-247.
18. Chimera, C., Coleman, M. C. & Parkes, J. P. (1995) Diet of feral goats and feral pigs on Auckland Island, New Zealand. *New Zealand Journal of Ecology* **19**, 203-207.
19. Cowan, P. E. (1990) Brushtail possum, in *The handbook of New Zealand mammals*, ed. King, C. M. (Oxford University Press, Auckland), pp. 68-98.
20. Pracy, L. T. (1962) *Introduction and liberation of the opossum (Trichosurus vulpecula) into New Zealand* (New Zealand Forest Service Information Series No. 45., Wellington).
21. Esler, A. E. (1978b) Botanical features of the Mokohinau Islands. *Tane* **24**, 187-197.
22. Dilks, P. J. (1979) Observations on the food of feral cats on Campbell Island. *New Zealand Journal of Ecology* **2**, 64-66.
23. Sorenson, J. H. (1951) *Wild life in the subantarctic* (Whitcombe & Tombs Ltd, Christchurch).
24. Wilson, P. R. & Orwin, D. F. G. (1964) The sheep population of Campbell Island. *New Zealand Journal of Science* **7**, 460-490.
25. Bell, L. C. (1954) Notes on the birds of the Chatham Islands. *Notornis* **6**, 65-68.

26. Cockayne, L. (1901) A short account of the plant-covering of Chatham Island. *Transactions and Proceedings of the New Zealand Institute* **34**, 243-324.
27. Blackburn, A. (1967) A brief survey of Cuvier Island. *Notornis* **14**, 3-8.
28. Wright, A. E. (1981) Auckland University Field Club Scientific Trip to Cuvier Island (Repanga), May 1980. *Tane* **27**, 1-6.
29. Beever, R. E., Parris, B. S. & Beever, J. E. (1969) Studies on the vegetation of Cuvier Island 1. The plant communities and a vascular plant species list. *Tane* **15**, 53-68.
30. Bell, B. D. & Blackburn, A. (1958) The islands of Gisborne, East Coast. *Notornis* **8**, 244-246.
31. Taylor, R. H. (1971) Influence of man on vegetation and wildlife of Enderby and Rose Islands, Auckland Islands. *New Zealand Journal of Botany* **9**, 225-268.
32. Ogle, C. C. (1981) Great Barrier Island wildlife survey. *Tane* **27**, 177-200.
33. Wright, A. E. (1976) Auckland University Field Club scientific trip to Great Mercury Island, May 1975. *Tane* **22**, 1-3.
34. Miskelly, C. M. (1987) The identity of the hakawai. *Notornis* **34**, 95-116.
35. Fitzgerald, B. M. & Veitch, C. R. (1985) The cats of Herekopare Island, New Zealand: their history, ecology and effects on birdlife. *New Zealand Journal of Zoology* **12**, 319-330.
36. Park, G. N. & Williams, P. A. (1970) Vegetation studies on Nukuwaiata, Cook Strait. *Bulletin of Natural Science, Victoria University of Wellington* **1**, 27-34.
37. Campbell, K. J. & Parkes, J. P. (unpub) *List of goats on islands*.
38. McCallum, J. (1982) Auckland University Field Club scientific trip to Little Barrier Island, August 1981. *Tane* **28**, 1-6.
39. Selkirk, P. M., Seppelt, R. D. & Selkirk, D. R. (1990) *Subantarctic Macquarie Island* (Cambridge University Press, Cambridge).
40. Cumpston, J. S. (1968) *Macquarie Island* (Antarctic Division, Department of External Affairs, Melbourne).

41. Csordas, S. (1985) Domestic animals on Macquarie Island. *Aurora* **18**, 23-26.
42. Moore, P. R. (1976) Notes on the Hahei Islands and adjacent mainland, Hahei, Coromandel Peninsula. *Tane* **22**, 145-153.
43. Atkinson, I. A. E. (pers comm) .
44. Fleming, C. A. (1939) Birds of the Chatham Islands. *Emu* **38**, 380-413.
45. Atkinson, I. A. E. & Percy, C. A. (1955-56) An account of the vegetation of Mayor Island. *Tane* **7**, 29-34.
46. Fineran, B. A. (1973) A botanical survey of seven mutton-bird islands, south west Stewart Island. *Journal of the Royal Society of New Zealand* **3**, 475-525.
47. Blackburn, A. (1965) Muttonbird islands diary. *Notornis* **12**, 191-207.
48. Thomson, G. M. (1922) *The naturalization of plants and animals in New Zealand* (Cambridge University Press, Cambridge).
49. Lee, M. (1999) Biota of seven islets off Waiheke Island, Inner Hauraki Gulf. *Tane* **37**, 99-136.
50. Esler, A. E. (1978a) Botanical features of islands near the west coast of the Coromandel Peninsula, New Zealand. *New Zealand Journal of Botany* **16**, 25-44.
51. Newhook, F. J., Dickson, E. M. & Bennett, K. J. (1971) A botanical survey of some offshore islands of the Coromandel Peninsula. *Tane* **17**, 97-117.
52. Cox, J. E., Taylor, R. H. & Mason, R. (1967) *Motunau Island, Canterbury, New Zealand, an ecological survey* (New Zealand Department of Scientific and Industrial Research Bulletin 178, Wellington).
53. Moller, H. & Tilley, J. A. V. (1986) Rodents and their predators in the eastern Bay of Islands. *New Zealand Journal of Zoology* **13**, 563-572.
54. Beever, J. E., Esler, A. E. & Wright, A. E. (1984) Botany of the large islands of the eastern Bay of Islands, northern New Zealand. *Tane* **30**, 251-273.
55. Beever, R. E., Wright, A. E., Whitehead, M. D., Barnes, F. & Scofield, R. P. (1985-86) Mosses of the Broken (Pig) Islands, northern New Zealand. *Tane* **31**, 105-110.

56. Hayward, B. (1979) Cavalli Islands trip, New Year 1978-79. *Tane* **25**, 35-40.
57. Moors, P. J. (1985) Norway rats (*Rattus norvegicus*) on the Noises and Motukawao Islands, Hauraki Gulf, New Zealand. *New Zealand Journal of Ecology* **8**, 37-54.
58. Anonymous (1964) To save an island. *Forest and Bird* **154**, 37-38.
59. Merton, D. V. (1961) Notes on some offshore islands. *Notornis* **9**, 162-169.
60. Holden, P. (1982) *The wild pig in New Zealand* (Hodder and Stoughton, Auckland).
61. Bellingham, P. J. (1979) The birds of Ponui (Chamberlin's) Island, Hauraki Gulf, August 1978. *Tane* **25**, 17-21.
62. Brown, E. A. (1979) Vegetation and flora of Ponui Island, Hauraki Gulf, New Zealand. *Tane* **25**, 5-16.
63. Bellingham, P. J., Hay, J. R., Hitchmough, R. A. & McCallum, J. (1982) Birds of Rakitu (Arid) Island. *Tane* **28**, 141-147.
64. Merton, D. V. (1970) Kermadec Islands expedition reports: a general account of birdlife. *Notornis* **17**, 147-199.
65. Hayward, B. W. & Moore, P. R. (1974) Auckland University Field Club scientific camp to Shoe Island and the Slipper Island Group, August 1973. *Tane* **20**, 1-3.
66. Waite, E. R. (1909) Vertebrata of the subantarctic islands of New Zealand, in *The subantarctic islands of New Zealand*, ed. Chilton, C. (Philosophical Institute of Canterbury, Christchurch), pp. 542-600.
67. Fineran, B. A. (1964) An outline of the vegetation of the Snares Islands. *Transactions of the Royal Society of New Zealand (Botany)* **2**, 229-235.
68. Taylor, G. A. & Lovegrove, T. G. (1997) Flora and vegetation of Stanley (Atiu) Island, Mercury Islands. *Tane* **36**, 85-111.
69. Anonymous (1982) *Tiritiri Matangi Island Working Plan* (Department of Lands and Survey, Auckland).
70. Anderson, G. R. V. (1971) Auckland University Field Club scientific camp Whale Island, August 1970. *Tane* **17**, 5-8.

71. Butts, C. A. & Potter, M. A. (1993) Birds of Motuhora (Whale Island), Bay of Plenty, New Zealand. *Tane* **34**, 141-144.
72. Ogle, C. C. (1987-90) Changes in the vegetation and vascular flora of Motuhora (Whale Island) 1970-1986. *Tane* **32**, 19-48.
